# Supplementary material for: Kinetics and mechanism of the oxidation of hydroxylamine by a {Mn3O4}4+ core in aqueous acidic media
Source: Royal Society of Chemistry journal article supplement (doi:10.1039/c1dt10549c), 2011-01-01
Supplement: c1dt10549c.pdf [file c1dt10549c.pdf]

## SUPPORTING INFORMATION

### Kinetics and Mechanism of the Oxidation of Hydroxylamine by a {Mn<sub>3</sub>O<sub>4</sub>}<sup>4+</sup> Core in Aqueous Acidic Media

Pulak Chandra Mandal,<sup>a</sup> Maharudra Chakraborty,<sup>a</sup> Suranjana Das,<sup>a</sup> Carolina Estarellas,<sup>b</sup>  
David Quiñonero,<sup>b</sup> Antonio Frontera<sup>\*b</sup> and Subrata Mukhopadhyay<sup>\*a</sup>

<sup>a</sup>*Department of Chemistry, Jadavpur University, Kolkata 700 032, India*

*E-mail: smukhopadhyay@chemistry.jdvu.ac.in*

<sup>b</sup>*Department of Chemistry, Universitat de les Illes Balears, Crta. de Valldemossa km 7.5,  
07122 Palma de Mallorca (Balears), Spain*

*E-mail: toni.frontera@uib.es*

| Content                                                | Pages    |
|--------------------------------------------------------|----------|
| Table S1                                               | S2       |
| Stoichiometric Results                                 | S2 – S3  |
| Table S2                                               | S4       |
| Proposed Scheme for the generation of N <sub>2</sub> O | S5       |
| Fig. S1                                                | S6       |
| Fig. S2                                                | S6       |
| Fig. S3                                                | S7       |
| Cartesian Coordinates                                  | S8 – S15 |

**Table S1** Stoichiometry of reduction of the  $\text{Mn}^{\text{IV}}_3$  complex (**1**) by hydroxylamine,  $T = 25\text{ }^\circ\text{C}$ ,  $C_{\text{phen}} = 5.0\text{ mM}$

| $\text{Mn}^{\text{IV}}_3$ (mM) | pH  | $T_{\text{R}}$ (mM) <sup>a</sup> | $\Delta[\text{Mn}^{\text{IV}}_3]/\Delta T_{\text{R}}$ |
|--------------------------------|-----|----------------------------------|-------------------------------------------------------|
| 0.10                           | 2.3 | 0.50                             | 0.30                                                  |
| 0.15                           | 3.0 | 0.80                             | 0.35                                                  |
| 0.20                           | 3.5 | 1.0                              | 0.34                                                  |
| 0.30                           | 4.0 | 1.20                             | 0.31                                                  |
|                                |     |                                  | Average = $0.32 \pm 0.02$                             |

<sup>a</sup>  $T_{\text{R}}$  = analytical concentration of hydroxylamine  $\approx [\text{NH}_3\text{OH}^+]$  (see text)

### Stoichiometric Results

The stoichiometric experiments were carried out in absence of any externally added  $\text{NaNO}_3$  and using hydroxylamine sulfate. However, the trinuclear Mn oxidant is a nitrate salt and so proper spectrophotometric blank correction was made for the detection of nitrate following Griess-Ilsovey reaction. No red coloration was observed when the product solution of the redox reaction was tested for nitrite and nitrate. These observations along with the observed value for  $\Delta[\text{Mn}^{\text{IV}}_3]/\Delta T_{\text{R}}$  (Table S1) clearly suggest  $\text{N}_2\text{O}$  as the sole oxidation product of hydroxylamine. The results of EDTA titration of the product solutions revealed quantitative formation of  $\text{Mn}^{\text{II}}$  as the only reduction product of **1**. The likely  $\text{Mn}^{\text{II}}$  species under the specified reaction condition is expected to be  $\text{Mn}^{\text{II}}$ -phen complexes.<sup>1</sup> Optical spectra for the product solutions were superimposable on those of mixtures of  $\text{Mn}(\text{NO}_3)_2$  and 1,10-phenanthroline under similar experimental condition (see Figure below).

## Reference

1. The stability constants (25.0 °C,  $I = 0.1$  M) for the formation of 1 : 1, 1 : 2, 1 : 3 complexes of  $Mn^{2+}$  and phen are, respectively,  $1 \times 10^4 M^{-1}$ ,  $2 \times 10^7 M^{-2}$  and  $2 \times 10^{10} M^{-3}$ , and the  $pK_a$  (25.0 °C,  $I = 1.0$  M) of  $Hphen^+$  is 5.12. See: R. M. Smith, A. E. Martell, *Critical Stability Constants*, Plenum, New York, 1975, **2**, p. 251.

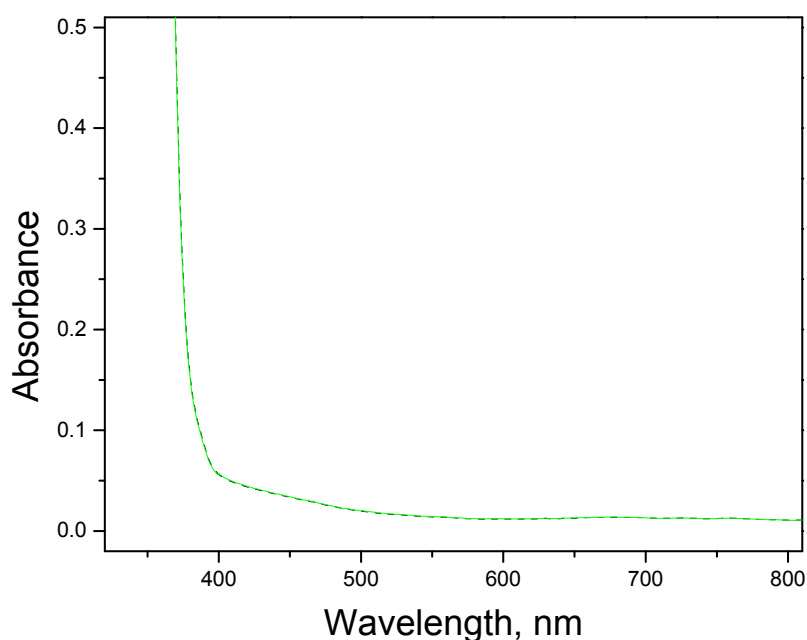

**Figure.** Optical spectrum (shown in black) of product solution when 0.10 mM of  $[Mn^{IV}_3(\mu-O)_4(phen)_4(H_2O)_2]^{4+}$  (**1**) is reacted with 2.0 mM N(-I) in aqueous acidic media at pH 3.65 in presence 5.0 mM phen. The spectrum shown in green is that of a mixture of 0.30 mM  $Mn(NO_3)_2$  and 5.0 mM phen at pH 3.65. Both at  $I = 1.0$  M ( $NaNO_3$ ),  $T = 25.0$  °C.

**Table S2** Some representative first-order rate constants ( $k_0$ ,  $s^{-1}$ ) for the oxidation of hydroxylamine in H<sub>2</sub>O solvent by the title complex (**1**) (0.10 mM) at T = 25.0 °C, I = 1.0 M (NaNO<sub>3</sub>)

| pH   | T <sub>R</sub> (mM) | C <sub>phen</sub> (mM) | 10 <sup>3</sup> k <sub>0</sub> (s <sup>-1</sup> ) |
|------|---------------------|------------------------|---------------------------------------------------|
| 2.00 | 2.0                 | 5.0                    | 3.35                                              |
| 2.26 | 2.0                 | 5.0                    | 3.44                                              |
| 2.40 | 2.0                 | 5.0                    | 3.45                                              |
| 2.60 | 2.0                 | 5.0                    | 3.60                                              |
| 2.76 | 2.0                 | 5.0                    | 3.70                                              |
| 2.94 | 2.0                 | 5.0                    | 3.90                                              |
| 3.15 | 2.0                 | 5.0                    | 4.10                                              |
| 3.45 | 2.0                 | 5.0                    | 4.80                                              |
| 3.75 | 2.0                 | 5.0                    | 5.70                                              |
| 4.07 | 2.0                 | 5.0                    | 7.25                                              |
| 3.42 | 4.0                 | 5.0                    | 9.20                                              |
| 3.43 | 6.0                 | 5.0                    | 14.6                                              |
| 3.42 | 8.0                 | 5.0                    | 19.0                                              |
| 3.26 | 8.0                 | 5.0                    | 18.0                                              |
| 3.15 | 2.0                 | 2.0                    | 4.18                                              |
| 3.13 | 2.0                 | 10.0                   | 4.11                                              |
| 3.14 | 2.0                 | 15.0                   | 3.95                                              |
| 3.15 | 2.0                 | 20.0                   | 4.00                                              |
| 3.09 | 5.0                 | 5.0                    | 10.0                                              |
| 3.09 | 5.0                 | 5.0                    | 7.50 <sup>a</sup>                                 |
| 3.07 | 5.0                 | 5.0                    | 12.0 <sup>b</sup>                                 |
| 4.05 | 2.0                 | 5.0                    | 7.44 <sup>c</sup>                                 |
| 4.05 | 2.0                 | 5.0                    | 7.33 <sup>d</sup>                                 |

<sup>a</sup> I = 0.5 M (NaNO<sub>3</sub>). <sup>b</sup> I = 1.5 M (NaNO<sub>3</sub>). <sup>c</sup> [1] = 0.20 mM. <sup>d</sup> kinetics measured at 450

nm.

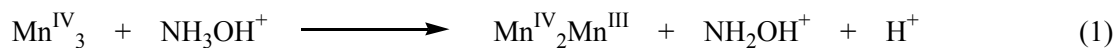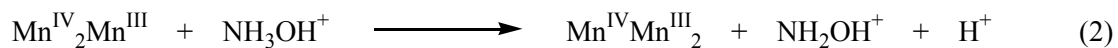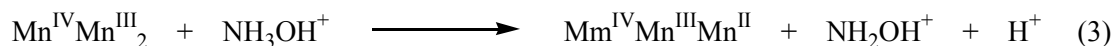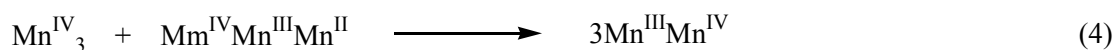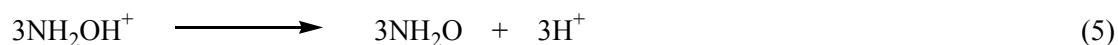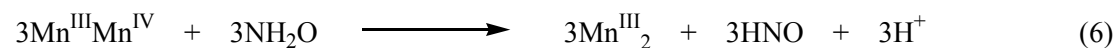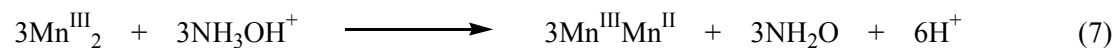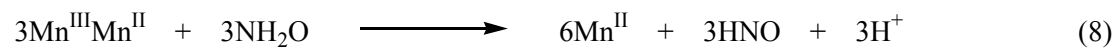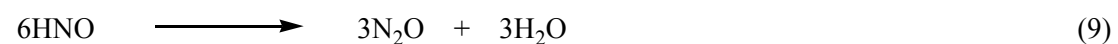

Adding equations (1) to (9), the stoichiometric equation (10) results

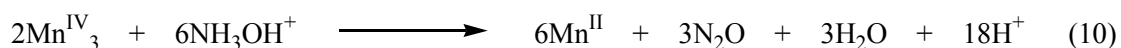

### Proposed scheme for the generation of N<sub>2</sub>O

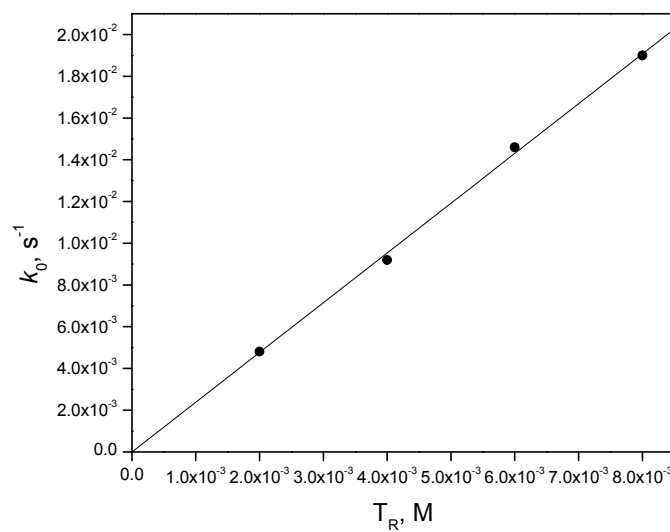

**Fig. S1** Plot of  $k_0$  versus  $T_R$  at  $[1] = 0.10$  mM,  $C_{\text{phen}} = 5.0$  mM,  $T = 25.0$  °C,  $I = 1.0$  M ( $\text{NaNO}_3$ ),  $\text{pH} = 3.40 \pm 0.05$ .

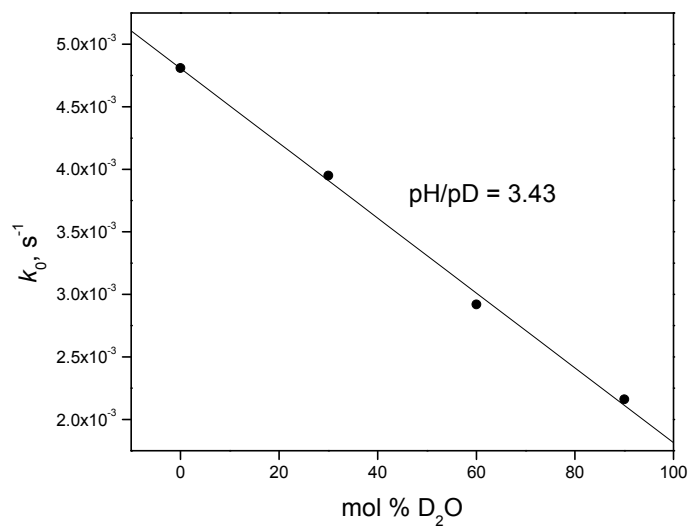

**Fig. S2** Effect of the amount of  $\text{D}_2\text{O}$  (mol %) on  $k_0$  at  $[1] = 0.1$  mM,  $T = 25.0$  °C,  $I = 1.0$  M ( $\text{NaNO}_3$ ),  $C_{\text{phen}} = 5.0$  mM,  $T_R = 2.0$  mM.

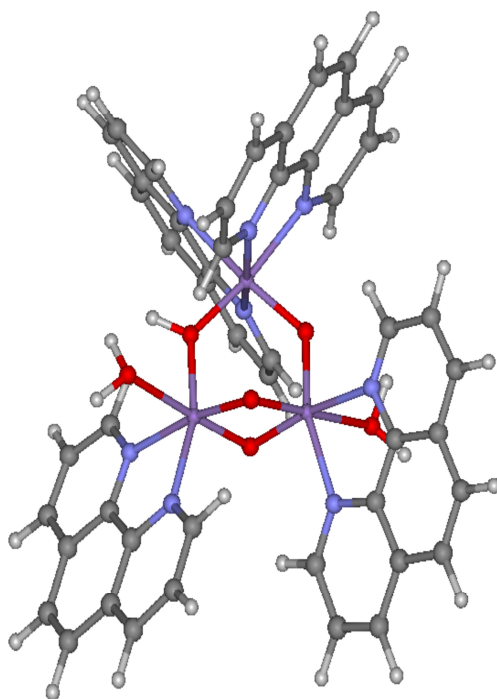

**Fig. S3.** Optimized geometry (RI-BP86/def2-TZVP) of protonated species **1B** (**1A** +  $\text{H}^+$   $\rightarrow$  **1B**).

## Cartesian coordinates

### 1

101

Energy = -6194.199028237 Hartrees

|    |            |            |            |
|----|------------|------------|------------|
| Mn | 0.1810513  | -2.2527834 | 0.0676140  |
| O  | 0.6288143  | -1.1340345 | -1.2637974 |
| O  | -1.0788204 | -1.2087392 | 0.8082018  |
| N  | -1.1128854 | -3.3368875 | -1.0925492 |
| N  | 1.5047428  | -3.7245415 | -0.7278560 |
| N  | -0.0672285 | -3.6614742 | 1.6540344  |
| N  | 1.6457941  | -1.6324982 | 1.3595773  |
| Mn | -1.7046213 | 0.4671271  | 0.3508680  |
| O  | -0.1023650 | 1.1899329  | 0.0033007  |
| O  | -1.7370631 | 0.1857638  | -1.4614886 |
| O  | -3.6471900 | -0.4793284 | 0.6448923  |
| N  | -1.7545475 | 1.1322256  | 2.3385227  |
| N  | -2.8605436 | 2.2069760  | 0.1747686  |
| Mn | 0.0009344  | 0.5442435  | -1.7122271 |
| O  | 2.1279013  | 0.9829113  | -1.8876780 |
| N  | -0.2021035 | 2.4632580  | -2.5276313 |
| N  | -0.0599247 | 0.1156147  | -3.7637722 |
| C  | -2.4169059 | -3.0922736 | -1.2712725 |
| C  | -3.2277922 | -3.9345580 | -2.0513115 |
| C  | -2.6793353 | -5.0505648 | -2.6619995 |
| C  | -1.2996661 | -5.3232592 | -2.5050181 |
| C  | -0.6285839 | -6.4425225 | -3.1011119 |
| C  | 0.7138726  | -6.6394635 | -2.9189185 |
| C  | 1.4941397  | -5.7352116 | -2.1237181 |
| C  | 2.8859623  | -5.8707395 | -1.9071024 |
| C  | 3.5447501  | -4.9339965 | -1.1292201 |
| C  | 2.8217232  | -3.8738932 | -0.5535665 |
| C  | 0.8475167  | -4.6309572 | -1.5094634 |
| C  | -0.5482579 | -4.4241917 | -1.7029895 |
| C  | -0.9608720 | -4.6464716 | 1.7907259  |
| C  | -0.9710684 | -5.5086812 | 2.9016755  |
| C  | -0.0271395 | -5.3496366 | 3.9017877  |
| C  | 0.9251908  | -4.3083973 | 3.7958981  |
| C  | 1.9380118  | -4.0445031 | 4.7776030  |
| C  | 2.8193265  | -3.0081594 | 4.6229753  |
| C  | 2.7572954  | -2.1491460 | 3.4753061  |
| C  | 3.6225414  | -1.0500603 | 3.2599390  |
| C  | 3.4675953  | -0.2723708 | 2.1237159  |
| C  | 2.4655193  | -0.5872996 | 1.1893819  |
| C  | 1.7710946  | -2.4018669 | 2.4851733  |
| C  | 0.8569397  | -3.4825557 | 2.6433370  |
| C  | -1.1845432 | 0.5572933  | 3.4015858  |
| C  | -1.2601638 | 1.1231553  | 4.6859738  |
| C  | -1.9458559 | 2.3128696  | 4.8752995  |
| C  | -2.5643367 | 2.9434336  | 3.7695664  |
| C  | -3.3216929 | 4.1602119  | 3.8496926  |
| C  | -3.9214722 | 4.6950900  | 2.7407075  |
| C  | -3.8032502 | 4.0631479  | 1.4575871  |
| C  | -4.4202405 | 4.5335315  | 0.2735016  |
| C  | -4.2514906 | 3.8322371  | -0.9107666 |
| C  | -3.4572497 | 2.6722668  | -0.9293745 |
| C  | -3.0353905 | 2.8749084  | 1.3530831  |
| C  | -2.4291793 | 2.3069490  | 2.5098519  |
| C  | -0.1951753 | 3.6268463  | -1.8660969 |
| C  | -0.2931481 | 4.8603028  | -2.5337905 |
| C  | -0.4157467 | 4.8891275  | -3.9146703 |
| C  | -0.4229164 | 3.6738951  | -4.6408431 |
| C  | -0.5285703 | 3.5818696  | -6.0691098 |
| C  | -0.4951966 | 2.3684937  | -6.7032868 |
| C  | -0.3400474 | 1.1484293  | -5.9632819 |
| C  | -0.2620591 | -0.1373394 | -6.5493027 |
| C  | -0.0845718 | -1.2469418 | -5.7376996 |
| C  | 0.0148177  | -1.0851168 | -4.3450552 |



|   |            |            |            |
|---|------------|------------|------------|
| C | -0.2403689 | 1.2166135  | -4.5508185 |
| C | -0.2986988 | 2.4768781  | -3.8898855 |
| H | -2.8141156 | -2.2053426 | -0.7822825 |
| H | -4.2854925 | -3.6977023 | -2.1612847 |
| H | -3.3002916 | -5.7184146 | -3.2620120 |
| H | -1.2104747 | -7.1387632 | -3.7067183 |
| H | 1.2120865  | -7.4936421 | -3.3797993 |
| H | 3.4286979  | -6.7061436 | -2.3529437 |
| H | 4.6170031  | -5.0053830 | -0.9489948 |
| H | 3.3274425  | -3.1320390 | 0.0630483  |
| H | -1.6971624 | -4.7621793 | 0.9962078  |
| H | -1.7228442 | -6.2955223 | 2.9569873  |
| H | -0.0138567 | -6.0148452 | 4.7668760  |
| H | 1.9941302  | -4.6877448 | 5.6569180  |
| H | 3.5850681  | -2.8188566 | 5.3763721  |
| H | 4.4015790  | -0.8209335 | 3.9892903  |
| H | 4.1142411  | 0.5843993  | 1.9376837  |
| H | 2.3114033  | 0.0079374  | 0.2922185  |
| H | -0.6661097 | -0.3827897 | 3.2132539  |
| H | -0.7834082 | 0.6150112  | 5.5232425  |
| H | -2.0178869 | 2.7611298  | 5.8678327  |
| H | -3.4235492 | 4.6501527  | 4.8189665  |
| H | -4.5066374 | 5.6121989  | 2.8208263  |
| H | -5.0331571 | 5.4363750  | 0.3016570  |
| H | -4.7311902 | 4.1632975  | -1.8313474 |
| H | -3.2975673 | 2.0943266  | -1.8401665 |
| H | -0.1023704 | 3.5611949  | -0.7815948 |
| H | -0.2665778 | 5.7824029  | -1.9540063 |
| H | -0.4954555 | 5.8398303  | -4.4452265 |
| H | -0.6310324 | 4.5013324  | -6.6469076 |
| H | -0.5743577 | 2.3146270  | -7.7899359 |
| H | -0.3350820 | -0.2471884 | -7.6327727 |
| H | -0.0134504 | -2.2458043 | -6.1665269 |
| H | 0.1674743  | -1.9301614 | -3.6739473 |
| H | -3.6918196 | -1.0333160 | 1.4468012  |
| H | -4.4827680 | 0.0233085  | 0.6005731  |
| H | 2.6264073  | 0.2662026  | -2.3235311 |
| H | 2.4573089  | 1.8237098  | -2.2584302 |

## 1A

101

Energy = -6194.655395222 Hartrees

|    |            |            |            |
|----|------------|------------|------------|
| Mn | 0.1752237  | -2.2335707 | 0.0576480  |
| O  | 0.6622520  | -1.0936437 | -1.2550773 |
| O  | -1.1211301 | -1.2092292 | 0.7897567  |
| N  | -1.0843353 | -3.2900255 | -1.1432259 |
| N  | 1.5047935  | -3.6989787 | -0.7227003 |
| N  | -0.0818486 | -3.6510975 | 1.6277917  |
| N  | 1.5922717  | -1.6042823 | 1.3780413  |
| Mn | -1.7067563 | 0.4607976  | 0.3418443  |
| O  | -0.1033919 | 1.1930834  | 0.0082363  |
| O  | -1.7397165 | 0.1824215  | -1.4650198 |
| O  | -3.6423729 | -0.5228896 | 0.6659288  |
| N  | -1.7470707 | 1.1279922  | 2.3479359  |
| N  | -2.8710553 | 2.2108588  | 0.1964018  |
| Mn | 0.0006576  | 0.5491677  | -1.7004435 |
| O  | 2.1509535  | 0.9616122  | -1.8810903 |
| N  | -0.2083783 | 2.4658655  | -2.5485211 |
| N  | -0.0535544 | 0.1091732  | -3.7683604 |
| C  | -2.3671197 | -3.0073388 | -1.4042828 |
| C  | -3.1685316 | -3.8439772 | -2.2002912 |
| C  | -2.6369112 | -5.0015644 | -2.7447001 |
| C  | -1.2760921 | -5.3091634 | -2.5165433 |
| C  | -0.6078335 | -6.4579019 | -3.0584541 |
| C  | 0.7262520  | -6.6700130 | -2.8394494 |
| C  | 1.5040466  | -5.7507824 | -2.0592810 |
| C  | 2.8929508  | -5.8796985 | -1.8320846 |
| C  | 3.5485761  | -4.9159136 | -1.0842935 |

|   |            |            |            |
|---|------------|------------|------------|
| C | 2.8213480  | -3.8413199 | -0.5432419 |
| C | 0.8555802  | -4.6276414 | -1.4823037 |
| C | -0.5338744 | -4.4077064 | -1.7101650 |
| C | -0.9801067 | -4.6323803 | 1.7553769  |
| C | -0.9876996 | -5.5161445 | 2.8485707  |
| C | -0.0321861 | -5.3850199 | 3.8423155  |
| C | 0.9223427  | -4.3470180 | 3.7499107  |
| C | 1.9384593  | -4.0977173 | 4.7318576  |
| C | 2.8018207  | -3.0436270 | 4.6029306  |
| C | 2.7205366  | -2.1496140 | 3.4829639  |
| C | 3.5434439  | -1.0123289 | 3.3144897  |
| C | 3.3494176  | -0.1948886 | 2.2128566  |
| C | 2.3642335  | -0.5156608 | 1.2624793  |
| C | 1.7456783  | -2.3991750 | 2.4820240  |
| C | 0.8469636  | -3.4973033 | 2.6151869  |
| C | -1.1609782 | 0.5557655  | 3.4004809  |
| C | -1.2060839 | 1.1264408  | 4.6851785  |
| C | -1.8815126 | 2.3197921  | 4.8823335  |
| C | -2.5161295 | 2.9492096  | 3.7860209  |
| C | -3.2599064 | 4.1736469  | 3.8739725  |
| C | -3.8685176 | 4.7131550  | 2.7728118  |
| C | -3.7749785 | 4.0792741  | 1.4885396  |
| C | -4.3928836 | 4.5629236  | 0.3111279  |
| C | -4.2431331 | 3.8622088  | -0.8749509 |
| C | -3.4684146 | 2.6882688  | -0.8990256 |
| C | -3.0265803 | 2.8800686  | 1.3743153  |
| C | -2.4084921 | 2.3060896  | 2.5269568  |
| C | -0.2221617 | 3.6331590  | -1.8992301 |
| C | -0.3462255 | 4.8611746  | -2.5741845 |
| C | -0.4698074 | 4.8776672  | -3.9541962 |
| C | -0.4549421 | 3.6569604  | -4.6694961 |
| C | -0.5671871 | 3.5514679  | -6.0963434 |
| C | -0.5254436 | 2.3341554  | -6.7210187 |
| C | -0.3557935 | 1.1212020  | -5.9728835 |
| C | -0.2805151 | -0.1684501 | -6.5490096 |
| C | -0.0958367 | -1.2705722 | -5.7302671 |
| C | 0.0167130  | -1.0940026 | -4.3395060 |
| C | -0.2434996 | 1.2007245  | -4.5618730 |
| C | -0.3089134 | 2.4692511  | -3.9084772 |
| H | -2.7515619 | -2.0853690 | -0.9743243 |
| H | -4.2081509 | -3.5685402 | -2.3735898 |
| H | -3.2513186 | -5.6682054 | -3.3519601 |
| H | -1.1852962 | -7.1606841 | -3.6605916 |
| H | 1.2220042  | -7.5430727 | -3.2659775 |
| H | 3.4369782  | -6.7283131 | -2.2497521 |
| H | 4.6205917  | -4.9790055 | -0.9011767 |
| H | 3.3206333  | -3.0786318 | 0.0538438  |
| H | -1.7218600 | -4.7258388 | 0.9623103  |
| H | -1.7446275 | -6.2982132 | 2.8959568  |
| H | -0.0142944 | -6.0671674 | 4.6936412  |
| H | 2.0057988  | -4.7619910 | 5.5943980  |
| H | 3.5642189  | -2.8605319 | 5.3611256  |
| H | 4.3119928  | -0.7822492 | 4.0539564  |
| H | 3.9533569  | 0.6994782  | 2.0645243  |
| H | 2.1773215  | 0.1149215  | 0.3967172  |
| H | -0.6539995 | -0.3887380 | 3.2005705  |
| H | -0.7145544 | 0.6191386  | 5.5142855  |
| H | -1.9325903 | 2.7739925  | 5.8732159  |
| H | -3.3411573 | 4.6670385  | 4.8433194  |
| H | -4.4402862 | 5.6380240  | 2.8587643  |
| H | -4.9890694 | 5.4762597  | 0.3470192  |
| H | -4.7214222 | 4.2042309  | -1.7920494 |
| H | -3.3205807 | 2.1061382  | -1.8095509 |
| H | -0.1264218 | 3.5716151  | -0.8144373 |
| H | -0.3394363 | 5.7875383  | -2.0009955 |
| H | -0.5698117 | 5.8212834  | -4.4932494 |
| H | -0.6849750 | 4.4650692  | -6.6802931 |
| H | -0.6124512 | 2.2704471  | -7.8064374 |
| H | -0.3633098 | -0.2857518 | -7.6307724 |
| H | -0.0290482 | -2.2734703 | -6.1501321 |
| H | 0.1776400  | -1.9295721 | -3.6577418 |

|   |            |            |            |
|---|------------|------------|------------|
| H | -3.4281980 | -1.2383764 | 1.2952287  |
| H | -4.4436664 | -0.0735988 | 0.9919667  |
| H | 2.5279130  | 0.0842521  | -2.0861053 |
| H | 2.5364660  | 1.6007601  | -2.5082003 |

## 1B

102

Energy = -6194.807616397 Hartrees

|    |            |            |            |
|----|------------|------------|------------|
| Mn | 0.2165122  | -2.3400181 | 0.1359046  |
| O  | 0.7056813  | -1.1384713 | -1.3295059 |
| O  | -0.9921243 | -1.1907164 | 0.7784416  |
| N  | -1.0637982 | -3.3663696 | -1.0651960 |
| N  | 1.5298936  | -3.8016680 | -0.6490122 |
| N  | -0.1167634 | -3.6547091 | 1.6821114  |
| N  | 1.6806162  | -1.7244836 | 1.4259894  |
| Mn | -1.6003468 | 0.4795128  | 0.2969988  |
| O  | -0.0085855 | 1.2385460  | -0.1031462 |
| O  | -1.6522688 | 0.1675889  | -1.5242618 |
| O  | -3.5145179 | -0.4853827 | 0.6537150  |
| N  | -1.6038626 | 1.1831246  | 2.2675992  |
| N  | -2.8179479 | 2.1770304  | 0.1238459  |
| Mn | 0.0230968  | 0.6515808  | -1.8255673 |
| O  | 2.1526941  | 1.1399501  | -1.9918914 |
| N  | -0.3131752 | 2.5101216  | -2.5926749 |
| N  | -0.0143208 | 0.2054264  | -3.8742931 |
| C  | -2.3526757 | -3.0845769 | -1.3000558 |
| C  | -3.1628833 | -3.9108915 | -2.0974296 |
| C  | -2.6351655 | -5.0587667 | -2.6663423 |
| C  | -1.2710996 | -5.3700432 | -2.4586163 |
| C  | -0.6154259 | -6.5192078 | -3.0141620 |
| C  | 0.7162912  | -6.7476702 | -2.7951894 |
| C  | 1.5015043  | -5.8447127 | -2.0034613 |
| C  | 2.8857663  | -6.0047066 | -1.7614053 |
| C  | 3.5526992  | -5.0649696 | -0.9925842 |
| C  | 2.8434350  | -3.9810689 | -0.4488814 |
| C  | 0.8677699  | -4.7138800 | -1.4244043 |
| C  | -0.5180598 | -4.4783852 | -1.6500257 |
| C  | -1.0769093 | -4.5798085 | 1.8076324  |
| C  | -1.1497209 | -5.4422306 | 2.9144316  |
| C  | -0.2026281 | -5.3543976 | 3.9212403  |
| C  | 0.8149976  | -4.3769433 | 3.8286632  |
| C  | 1.8341573  | -4.1772679 | 4.8196323  |
| C  | 2.7684410  | -3.1855279 | 4.6850442  |
| C  | 2.7584189  | -2.3086227 | 3.5492306  |
| C  | 3.6644788  | -1.2389253 | 3.3602875  |
| C  | 3.5406864  | -0.4353581 | 2.2374606  |
| C  | 2.5365195  | -0.7028984 | 1.2909465  |
| C  | 1.7746817  | -2.5074274 | 2.5450674  |
| C  | 0.8080693  | -3.5405701 | 2.6830578  |
| C  | -0.9790932 | 0.6505330  | 3.3214992  |
| C  | -1.0329833 | 1.2372378  | 4.5977669  |
| C  | -1.7592832 | 2.4019671  | 4.7901891  |
| C  | -2.4377009 | 2.9872650  | 3.6949904  |
| C  | -3.2441077 | 4.1717191  | 3.7814676  |
| C  | -3.9048348 | 4.6599805  | 2.6857796  |
| C  | -3.8019761 | 4.0114523  | 1.4095840  |
| C  | -4.4849670 | 4.4298616  | 0.2424285  |
| C  | -4.3297726 | 3.7126656  | -0.9340342 |
| C  | -3.4826956 | 2.5905998  | -0.9621212 |
| C  | -2.9830081 | 2.8582544  | 1.2961802  |
| C  | -2.3161421 | 2.3350957  | 2.4416387  |
| C  | -0.3797022 | 3.6594871  | -1.9082010 |
| C  | -0.5527601 | 4.8964554  | -2.5521493 |
| C  | -0.6759581 | 4.9463283  | -3.9322256 |
| C  | -0.6055824 | 3.7479499  | -4.6819299 |
| C  | -0.7094304 | 3.6781028  | -6.1116483 |
| C  | -0.6088748 | 2.4818018  | -6.7707361 |
| C  | -0.3777468 | 1.2589736  | -6.0558195 |

|   |            |            |            |
|---|------------|------------|------------|
| C | -0.2420064 | -0.0110094 | -6.6655101 |
| C | -0.0076986 | -1.1248498 | -5.8743164 |
| C | 0.1020754  | -0.9813109 | -4.4804814 |
| C | -0.2664069 | 1.3065457  | -4.6435568 |
| C | -0.4049387 | 2.5454551  | -3.9566885 |
| H | -2.7401772 | -2.1774503 | -0.8415351 |
| H | -4.2066800 | -3.6385673 | -2.2502522 |
| H | -3.2582417 | -5.7185693 | -3.2727331 |
| H | -1.2004440 | -7.2120339 | -3.6206686 |
| H | 1.2027282  | -7.6239174 | -3.2260969 |
| H | 3.4175764  | -6.8608236 | -2.1803037 |
| H | 4.6201940  | -5.1553227 | -0.7937893 |
| H | 3.3548748  | -3.2433019 | 0.1686044  |
| H | -1.8121040 | -4.6434886 | 1.0073373  |
| H | -1.9529391 | -6.1771663 | 2.9601026  |
| H | -0.2391143 | -6.0257818 | 4.7809444  |
| H | 1.8487596  | -4.8313166 | 5.6927539  |
| H | 3.5345918  | -3.0437158 | 5.4484653  |
| H | 4.4462395  | -1.0489514 | 4.0976871  |
| H | 4.2165306  | 0.4032342  | 2.0735768  |
| H | 2.4075399  | -0.0803901 | 0.4081048  |
| H | -0.4351746 | -0.2745502 | 3.1322848  |
| H | -0.5095961 | 0.7635166  | 5.4273161  |
| H | -1.8183175 | 2.8642235  | 5.7771155  |
| H | -3.3351867 | 4.6732161  | 4.7458893  |
| H | -4.5285714 | 5.5507315  | 2.7719811  |
| H | -5.1389365 | 5.3030747  | 0.2788614  |
| H | -4.8615367 | 4.0010717  | -1.8402376 |
| H | -3.3352937 | 2.0000788  | -1.8670450 |
| H | -0.2884006 | 3.5767293  | -0.8252114 |
| H | -0.5859618 | 5.8058328  | -1.9530310 |
| H | -0.8165318 | 5.9004673  | -4.4434669 |
| H | -0.8691741 | 4.6014803  | -6.6699368 |
| H | -0.6934016 | 2.4449361  | -7.8576686 |
| H | -0.3207889 | -0.1060578 | -7.7499779 |
| H | 0.1000579  | -2.1130810 | -6.3199013 |
| H | 0.2883855  | -1.8365072 | -3.8310432 |
| H | -3.4474690 | -1.1112254 | 1.3993749  |
| H | -4.3489852 | 0.0084314  | 0.7645256  |
| H | 2.5534779  | 1.3085865  | -2.8666742 |
| H | 2.4029124  | 1.9021140  | -1.4345882 |
| H | 1.6489604  | -1.2182498 | -1.5668678 |

## 2

100

Energy = -6194.035734372 Hartrees

|    |            |            |            |
|----|------------|------------|------------|
| Mn | 0.6521572  | -1.6238440 | 0.4786220  |
| O  | 1.1126888  | -0.5269311 | -0.8476186 |
| O  | -0.5323464 | -0.5939725 | 1.2623082  |
| N  | -0.7141452 | -2.6768367 | -0.6068165 |
| N  | 1.9150916  | -3.1365273 | -0.3921751 |
| N  | 0.4534689  | -3.0403294 | 2.0966234  |
| N  | 2.1677609  | -1.0195990 | 1.7331292  |
| Mn | -1.3660950 | 0.9988918  | 0.7047163  |
| O  | 0.3421010  | 1.8072531  | 0.3691101  |
| O  | -1.2684562 | 0.7525688  | -1.1366059 |
| O  | -2.9918271 | 0.1410161  | 0.9062016  |
| N  | -1.4035023 | 1.6995071  | 2.6813347  |
| N  | -2.4347184 | 2.7823993  | 0.4900384  |
| Mn | 0.4545135  | 1.1568081  | -1.2713303 |
| O  | 2.6491989  | 1.6146010  | -1.4639218 |
| N  | 0.2498210  | 3.0720264  | -2.1229640 |
| N  | 0.4797793  | 0.7345017  | -3.3800736 |
| C  | -2.0270343 | -2.4236550 | -0.6629444 |
| C  | -2.8937455 | -3.2280591 | -1.4275813 |
| C  | -2.3965987 | -4.3039355 | -2.1404427 |
| C  | -1.0115491 | -4.5916947 | -2.0913397 |
| C  | -0.3937228 | -5.6886342 | -2.7795422 |

|   |            |            |            |
|---|------------|------------|------------|
| C | 0.9518430  | -5.9183417 | -2.6814822 |
| C | 1.7899560  | -5.0718003 | -1.8829758 |
| C | 3.1849581  | -5.2518660 | -1.7344389 |
| C | 3.9017861  | -4.3755857 | -0.9384073 |
| C | 3.2309023  | -3.3284425 | -0.2807432 |
| C | 1.2006446  | -3.9833191 | -1.1873084 |
| C | -0.2013364 | -3.7393622 | -1.2991866 |
| C | -0.4496616 | -4.0058303 | 2.2771324  |
| C | -0.4505630 | -4.8397472 | 3.4102157  |
| C | 0.5139932  | -4.6668271 | 4.3866363  |
| C | 1.4756526  | -3.6406495 | 4.2358569  |
| C | 2.5029523  | -3.3571803 | 5.1964414  |
| C | 3.3827475  | -2.3262428 | 5.0067599  |
| C | 3.3055736  | -1.4917155 | 3.8421842  |
| C | 4.1573498  | -0.3883238 | 3.6011958  |
| C | 3.9803886  | 0.3713645  | 2.4577037  |
| C | 2.9696383  | 0.0321982  | 1.5401180  |
| C | 2.3112578  | -1.7681851 | 2.8675710  |
| C | 1.3957567  | -2.8458035 | 3.0626256  |
| C | -0.8955962 | 1.1012546  | 3.7566107  |
| C | -1.0181102 | 1.6545686  | 5.0443680  |
| C | -1.6905190 | 2.8526319  | 5.2171900  |
| C | -2.2518426 | 3.5013251  | 4.0929678  |
| C | -2.9999842 | 4.7249413  | 4.1502966  |
| C | -3.5536047 | 5.2709775  | 3.0238003  |
| C | -3.3987775 | 4.6431266  | 1.7427506  |
| C | -3.9780802 | 5.1174858  | 0.5431645  |
| C | -3.7828973 | 4.4133928  | -0.6343628 |
| C | -2.9985934 | 3.2462961  | -0.6279439 |
| C | -2.6359637 | 3.4503496  | 1.6598801  |
| C | -2.0719847 | 2.8738264  | 2.8354683  |
| C | 0.2058939  | 4.2278328  | -1.4543752 |
| C | 0.0822003  | 5.4642751  | -2.1132592 |
| C | -0.0144531 | 5.4989856  | -3.4949676 |
| C | 0.0316126  | 4.2899480  | -4.2287770 |
| C | -0.0504931 | 4.2077719  | -5.6590639 |
| C | 0.0244707  | 3.0023734  | -6.3031681 |
| C | 0.2020942  | 1.7802351  | -5.5723153 |
| C | 0.3137381  | 0.5031383  | -6.1703891 |
| C | 0.5024423  | -0.6100281 | -5.3681981 |
| C | 0.5829532  | -0.4556431 | -3.9721276 |
| C | 0.2844567  | 1.8353534  | -4.1578261 |
| C | 0.1806507  | 3.0915341  | -3.4846545 |
| H | -2.3945553 | -1.5708639 | -0.0810490 |
| H | -3.9561667 | -2.9878457 | -1.4388191 |
| H | -3.0598149 | -4.9363676 | -2.7333004 |
| H | -1.0217154 | -6.3444353 | -3.3841555 |
| H | 1.4074903  | -6.7576095 | -3.2086689 |
| H | 3.6839996  | -6.0768483 | -2.2453655 |
| H | 4.9776592  | -4.4853386 | -0.8069672 |
| H | 3.7779835  | -2.6304534 | 0.3526279  |
| H | -1.2076181 | -4.1239573 | 1.5037448  |
| H | -1.2141171 | -5.6111992 | 3.5023007  |
| H | 0.5348956  | -5.3059135 | 5.2706725  |
| H | 2.5672850  | -3.9784513 | 6.0906193  |
| H | 4.1560629  | -2.1180820 | 5.7470911  |
| H | 4.9389253  | -0.1400437 | 4.3210811  |
| H | 4.6117776  | 1.2350798  | 2.2535385  |
| H | 2.7892767  | 0.6167487  | 0.6401823  |
| H | -0.3941392 | 0.1509226  | 3.5748478  |
| H | -0.5898207 | 1.1265130  | 5.8952768  |
| H | -1.8009781 | 3.2919745  | 6.2097979  |
| H | -3.1345224 | 5.2095627  | 5.1181411  |
| H | -4.1341867 | 6.1920835  | 3.0874546  |
| H | -4.5864953 | 6.0233611  | 0.5555009  |
| H | -4.2354436 | 4.7451946  | -1.5680362 |
| H | -2.8206442 | 2.6585869  | -1.5292901 |
| H | 0.2744671  | 4.1451633  | -0.3688163 |
| H | 0.0642489  | 6.3816215  | -1.5260548 |
| H | -0.1177097 | 6.4491350  | -4.0219442 |
| H | -0.1722481 | 5.1294728  | -6.2293063 |

|   |            |            |            |
|---|------------|------------|------------|
| H | -0.0406885 | 2.9559137  | -7.3909787 |
| H | 0.2541236  | 0.4044693  | -7.2555175 |
| H | 0.5947056  | -1.6039163 | -5.8043804 |
| H | 0.7406077  | -1.3034067 | -3.3044675 |
| H | -3.7430027 | 0.5885875  | 0.4749900  |
| H | 3.1038677  | 0.9119151  | -1.9636512 |
| H | 2.9642009  | 2.4628287  | -1.8269402 |

## 2A

100

Energy = -6194.387137207 Hartrees

|    |            |            |            |
|----|------------|------------|------------|
| Mn | 0.6186217  | -1.6159282 | 0.5312155  |
| O  | 1.0746477  | -0.5005752 | -0.8475835 |
| O  | -0.6495655 | -0.5916936 | 1.2383862  |
| N  | -0.7177853 | -2.6767778 | -0.5498631 |
| N  | 1.8930491  | -3.0732981 | -0.3564817 |
| N  | 0.4711657  | -3.0111941 | 2.1160841  |
| N  | 2.0801316  | -0.9497223 | 1.7692424  |
| Mn | -1.4207248 | 0.9858824  | 0.6949068  |
| O  | 0.2779549  | 1.8095604  | 0.3759699  |
| O  | -1.3252398 | 0.7298573  | -1.1356429 |
| O  | -3.1012216 | 0.1830028  | 0.8862631  |
| N  | -1.4986999 | 1.6933767  | 2.6745509  |
| N  | -2.4650966 | 2.8200623  | 0.4657643  |
| Mn | 0.4001530  | 1.1443156  | -1.2664007 |
| O  | 2.6618246  | 1.4121956  | -1.4682291 |
| N  | 0.2833223  | 3.0705203  | -2.1257739 |
| N  | 0.3992482  | 0.7359443  | -3.3888038 |
| C  | -2.0344051 | -2.4309558 | -0.6250630 |
| C  | -2.8907057 | -3.2506423 | -1.3819850 |
| C  | -2.3896520 | -4.3415522 | -2.0743277 |
| C  | -1.0057705 | -4.6184721 | -2.0134575 |
| C  | -0.3676470 | -5.7143472 | -2.6855636 |
| C  | 0.9832790  | -5.9147035 | -2.5946111 |
| C  | 1.8123858  | -5.0367508 | -1.8198995 |
| C  | 3.2136016  | -5.1643081 | -1.6993373 |
| C  | 3.9136467  | -4.2450316 | -0.9334374 |
| C  | 3.2197060  | -3.2157780 | -0.2754225 |
| C  | 1.1989401  | -3.9584440 | -1.1289927 |
| C  | -0.2055882 | -3.7461915 | -1.2323258 |
| C  | -0.4258581 | -3.9819209 | 2.3180465  |
| C  | -0.3347872 | -4.8853419 | 3.3900243  |
| C  | 0.7166761  | -4.7854118 | 4.2880879  |
| C  | 1.6642199  | -3.7515641 | 4.1255657  |
| C  | 2.7588375  | -3.5065658 | 5.0207960  |
| C  | 3.5839434  | -2.4276991 | 4.8502004  |
| C  | 3.3881215  | -1.5035698 | 3.7688824  |
| C  | 4.1370721  | -0.3199557 | 3.5868233  |
| C  | 3.8035842  | 0.5335307  | 2.5459368  |
| C  | 2.7683856  | 0.1962602  | 1.6587297  |
| C  | 2.3527459  | -1.7664820 | 2.8351422  |
| C  | 1.4888519  | -2.8819616 | 3.0172769  |
| C  | -1.0231762 | 1.0786580  | 3.7536958  |
| C  | -1.1663387 | 1.6199997  | 5.0449065  |
| C  | -1.8253696 | 2.8256729  | 5.2130192  |
| C  | -2.3508556 | 3.4928719  | 4.0827853  |
| C  | -3.0753906 | 4.7304029  | 4.1370328  |
| C  | -3.5859444 | 5.3032273  | 3.0040452  |
| C  | -3.4110489 | 4.6891076  | 1.7191264  |
| C  | -3.9371828 | 5.2025576  | 0.5116011  |
| C  | -3.7228363 | 4.5154204  | -0.6716381 |
| C  | -2.9757697 | 3.3230488  | -0.6577287 |
| C  | -2.6793843 | 3.4764374  | 1.6374956  |
| C  | -2.1535034 | 2.8739584  | 2.8230109  |
| C  | 0.2948771  | 4.2221368  | -1.4525206 |
| C  | 0.2523021  | 5.4679967  | -2.1045795 |
| C  | 0.1816220  | 5.5177836  | -3.4873268 |
| C  | 0.1723785  | 4.3122174  | -4.2268763 |

|   |            |            |            |
|---|------------|------------|------------|
| C | 0.1035355  | 4.2381527  | -5.6585742 |
| C | 0.1085556  | 3.0327797  | -6.3072061 |
| C | 0.1997585  | 1.7987952  | -5.5803306 |
| C | 0.2266428  | 0.5177108  | -6.1782292 |
| C | 0.3322109  | -0.6064411 | -5.3756699 |
| C | 0.4212898  | -0.4578306 | -3.9790230 |
| C | 0.2773375  | 1.8461619  | -4.1652235 |
| C | 0.2411040  | 3.1050102  | -3.4862951 |
| H | -2.4075795 | -1.5688624 | -0.0595743 |
| H | -3.9533497 | -3.0117584 | -1.4046550 |
| H | -3.0476837 | -4.9862026 | -2.6593411 |
| H | -0.9849568 | -6.3908905 | -3.2785301 |
| H | 1.4523703  | -6.7508357 | -3.1151906 |
| H | 3.7321810  | -5.9777114 | -2.2089855 |
| H | 4.9957696  | -4.3106175 | -0.8263076 |
| H | 3.7523922  | -2.4882885 | 0.3372045  |
| H | -1.2485875 | -4.0431873 | 1.6067892  |
| H | -1.0964508 | -5.6562387 | 3.5000131  |
| H | 0.8082057  | -5.4819925 | 5.1225143  |
| H | 2.9093692  | -4.1875463 | 5.8594380  |
| H | 4.3972892  | -2.2408535 | 5.5525335  |
| H | 4.9482014  | -0.0772224 | 4.2746950  |
| H | 4.3355557  | 1.4723955  | 2.3968670  |
| H | 2.4637952  | 0.8646513  | 0.8568272  |
| H | -0.5306812 | 0.1240610  | 3.5658762  |
| H | -0.7627814 | 1.0783824  | 5.8995317  |
| H | -1.9518954 | 3.2596047  | 6.2061574  |
| H | -3.2233073 | 5.2058653  | 5.1076298  |
| H | -4.1452351 | 6.2378592  | 3.0639703  |
| H | -4.5163685 | 6.1274120  | 0.5229656  |
| H | -4.1297400 | 4.8800918  | -1.6141436 |
| H | -2.7822263 | 2.7437119  | -1.5620226 |
| H | 0.3399003  | 4.1231621  | -0.3667254 |
| H | 0.2741409  | 6.3812035  | -1.5110998 |
| H | 0.1394184  | 6.4747539  | -4.0102387 |
| H | 0.0454633  | 5.1675339  | -6.2266790 |
| H | 0.0506954  | 2.9944088  | -7.3958482 |
| H | 0.1657956  | 0.4244210  | -7.2637637 |
| H | 0.3548497  | -1.6047043 | -5.8113006 |
| H | 0.5211824  | -1.3114622 | -3.3071764 |
| H | -3.7706480 | 0.6093602  | 0.3214156  |
| H | 2.6530627  | 0.4264461  | -1.3768071 |
| H | 3.0596710  | 1.6197945  | -2.3323762 |
